# Supplementary material for: Establishment of intestinal organoid cultures modeling injury-associated epithelial regeneration
Source: PubMed Central journal article supplement (PMC8027647; doi:10.1038/s41422-020-00453-x), 2021-01-08
Supplement: 41422_2020_453_MOESM1_ESM.pdf [file 41422_2020_453_MOESM1_ESM.pdf]

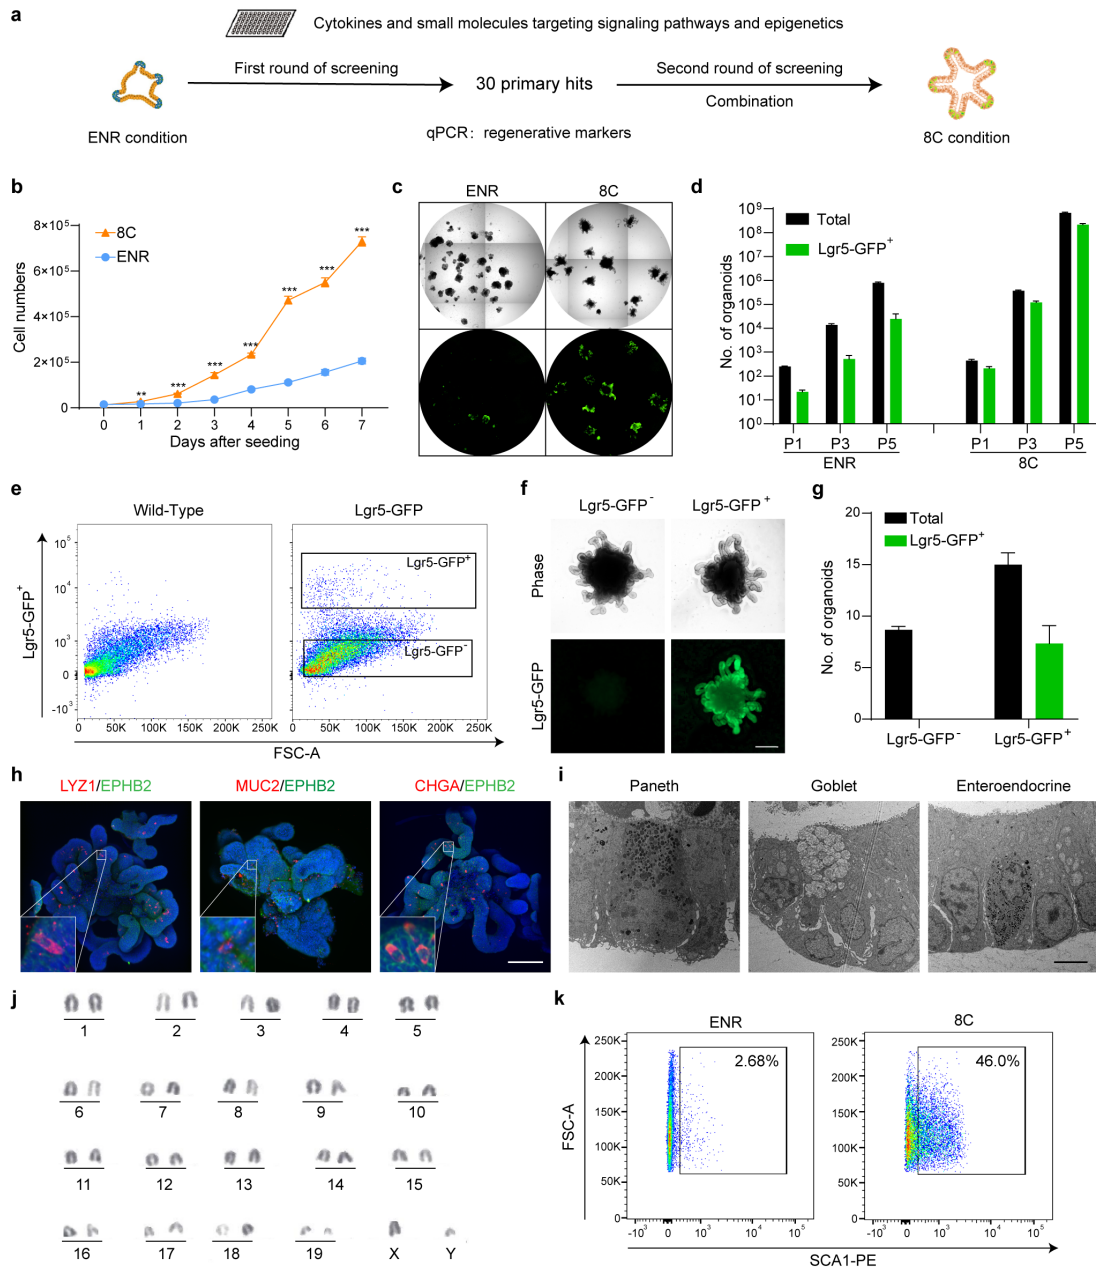

## Supplementary information Fig. S1 Characterization of hyperplastic intestinal organoids

**a**, Scheme of screening strategy for inducing intestinal organoids with regenerative features.

**b**, Growth curves of organoids under the indicated conditions within 7 days ( $n = 4$  wells).

$P$  values were determined by two-sided unpaired  $t$ -test.

- c**, Representative images of organoids cultured under the indicated conditions.
- d**, Quantification of total/Lgr5-GFP-expressing organoid number at different passages (n = 4 wells).
- e**, FACS sorting of freshly isolated single Lgr5-GFP<sup>+</sup> and Lgr5-GFP<sup>-</sup> cells. GFP<sup>+</sup> and GFP<sup>-</sup> single cell populations were collected respectively.
- f**, Representative images of organoids from single Lgr5-GFP<sup>+</sup> and Lgr5-GFP<sup>-</sup> cells cultured under the 8C condition. Scale bars, 100 μm.
- g**, Quantification of total/Lgr5-GFP-expressing organoid number from single Lgr5-GFP<sup>+</sup> and Lgr5-GFP<sup>-</sup> cells cultured under the 8C condition (n = 3 wells).
- h**, Immunofluorescence staining of representative marker genes expressed by Paneth (*Lyz1*), enteroendocrine (*Chga*) and goblet (*Muc2*) cells in organoids cultured in the 8C condition. Scale bars, 100 μm.
- i**, Detection of Paneth, enteroendocrine and goblet cells in organoids cultured in the 8C condition by transmission electron microscopy. Scale bars, 4 μm.
- j**, Metaphase spread of a cell cultured in the 8C condition over 140 d.
- k**, FACS analysis of SCA1<sup>+</sup> cells in different organoids shown in Fig. 1d.

\*\*\* $P < 0.001$ ; \*\* $P < 0.01$ . All experiments were independently replicated at least twice with similar results.
