# Supplementary material for: Establishment of intestinal organoid cultures modeling injury-associated epithelial regeneration
Source: PubMed Central journal article supplement (PMC8027647; doi:10.1038/s41422-020-00453-x), 2021-01-08
Supplement: 41422_2020_453_MOESM3_ESM.pdf [file 41422_2020_453_MOESM3_ESM.pdf]

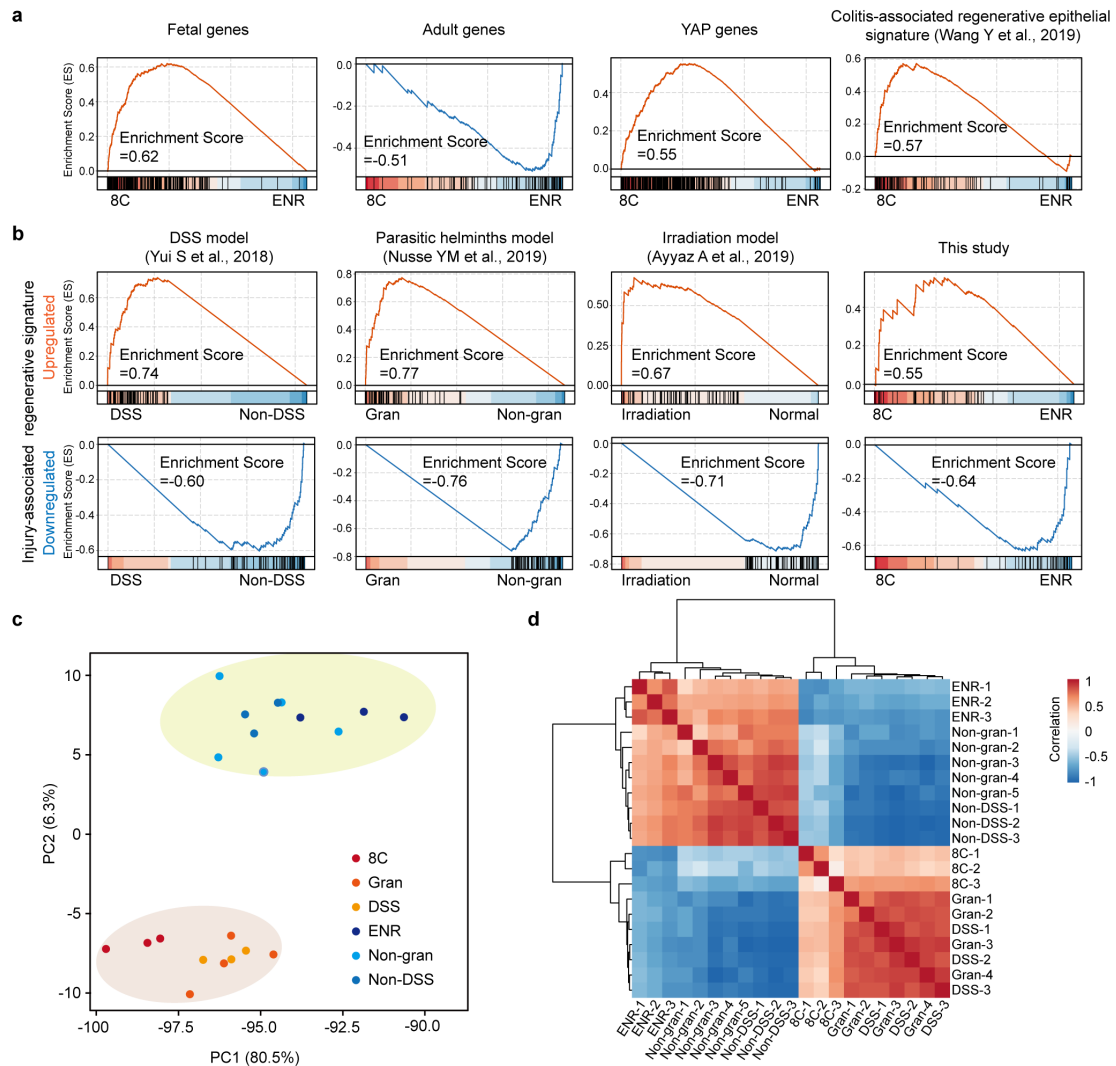

**Supplementary information Fig. S3 Transcriptome analysis of Hyper-organoids**

**a**, GSEA analysis showing enrichment of intestinal epithelial signature genes and colitis-associated regenerative genes in organoids cultured under the indicated conditions.

**b**, GSEA analysis showing enrichment of an injury-associated regenerative signature across different intestinal epithelium and organoids.

**c, d**, PCA analysis (c) and correlation matrix (d) of bulk RNA-seq data showing that Hyper-organoids resembled injury-associated epithelial cells more closely than ENR-organoids.
