# Supplementary material for: Establishment of intestinal organoid cultures modeling injury-associated epithelial regeneration
Source: PubMed Central journal article supplement (PMC8027647; doi:10.1038/s41422-020-00453-x), 2021-01-08
Supplement: 41422_2020_453_MOESM5_ESM.pdf [file 41422_2020_453_MOESM5_ESM.pdf]

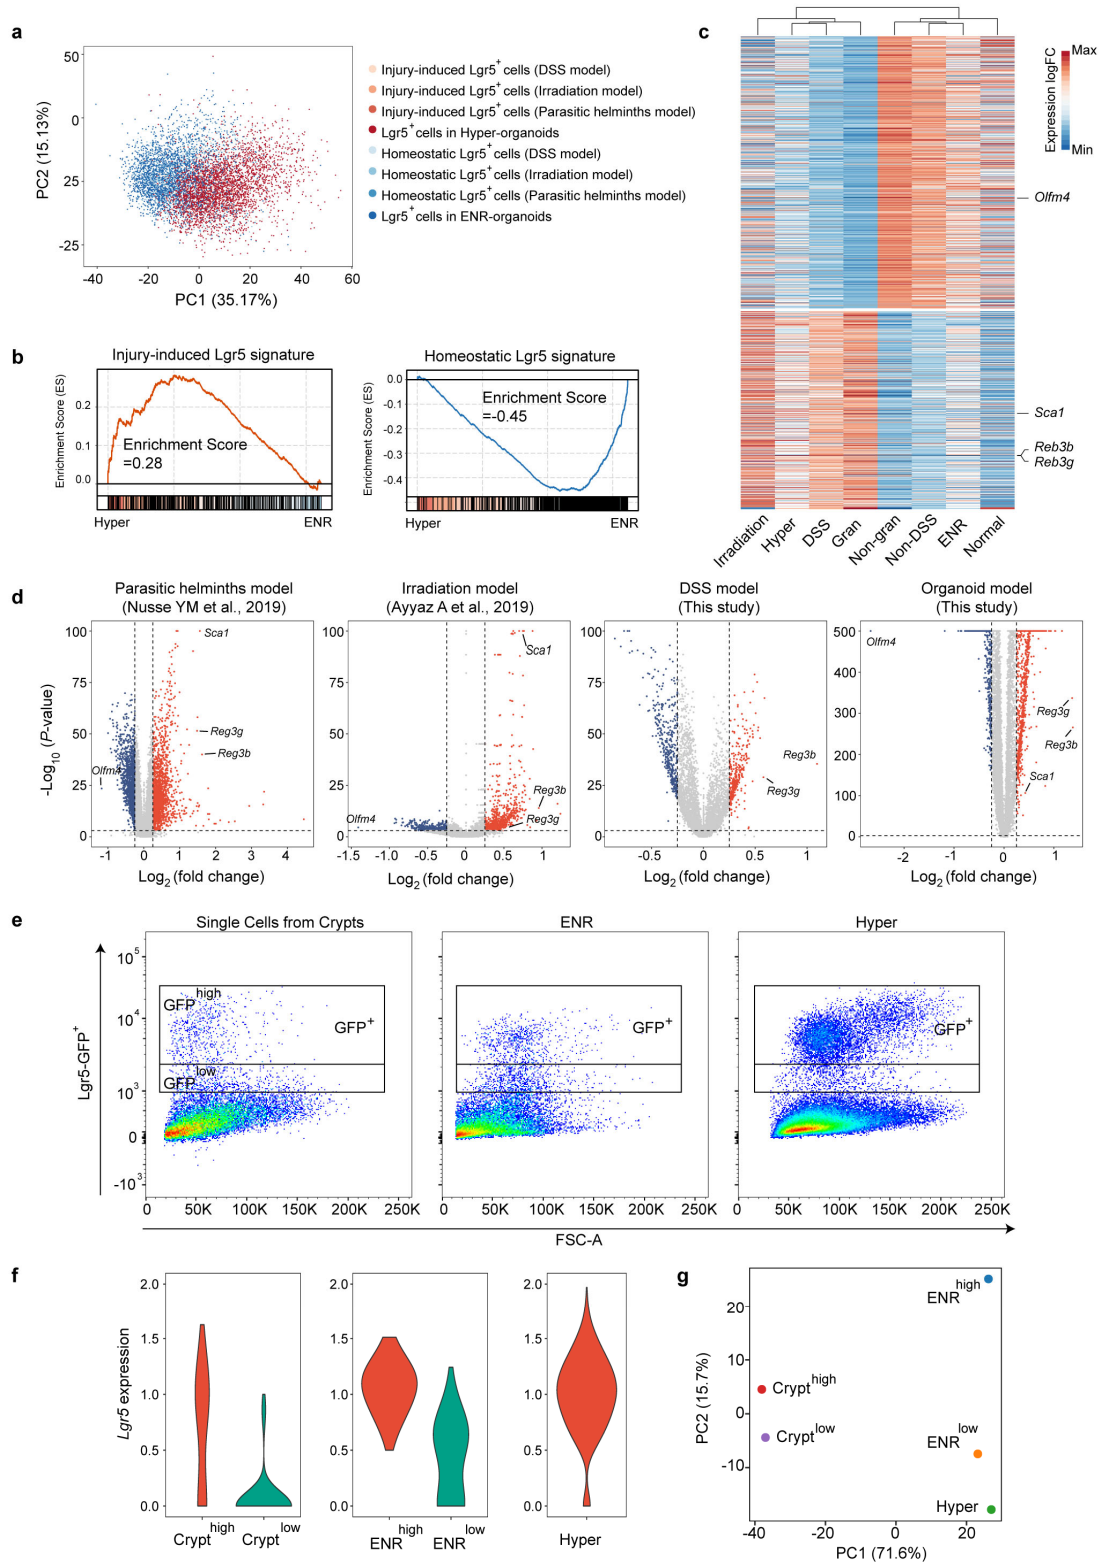

**Supplementary information Fig. S5 Single-cell transcriptome analysis of injury-responsive and homeostatic  $Lgr5^+$  cells**

**a.** PCA analysis of scRNA-seq data showing that  $Lgr5^+$  cells of Hyper-organoids

resembled injury-responsive  $Lgr5^+$  cells *in vivo*.

- b**, GSEA analysis showing enrichment of injury-responsive  $Lgr5$  signature and homeostatic  $Lgr5$  signature in  $Lgr5^+$  cells of ENR and Hyper-organoids.
- c**, Heatmap displaying the expression log fold change of an injury-responsive  $Lgr5$  signature in different organoids and primary crypts from different intestinal injury models. The expression profile of organoids cultured in the ENR and 8C conditions were plotted. Representative genes are shown on the right. Gran and Non-gran indicate crypts overlying and adjacent to granulomas, respectively. DSS and Non-DSS indicate crypts from repairing epithelium during dextran sulfate sodium (DSS)-associated colitis, and normal epithelium without DSS treatment, respectively.
- d**, Volcano plot displaying the results of differential gene-expression analysis performed in injury-responsive  $Lgr5^+$  cells and homeostatic  $Lgr5^+$  cells. The top DEGs are indicated.
- e**, FACS analysis of single cells showed two distinct  $GFP^{high}$  and  $GFP^{low}$  populations, which represented  $Lgr5$ -high and  $Lgr5$ -low subsets, respectively.
- f**, Volcano plot displaying the  $Lgr5$  expression in single cells to define the  $Lgr5$ -high or  $Lgr5$ -low subsets.
- g**, PCA analysis of scRNA-seq data showing that  $Lgr5^+$  cells in the Hyper-organoids were distinct from  $Lgr5$ -high and  $Lgr5$ -low cells in the ENR organoids.
