# Supplementary material for: Establishment of intestinal organoid cultures modeling injury-associated epithelial regeneration
Source: PubMed Central journal article supplement (PMC8027647; doi:10.1038/s41422-020-00453-x), 2021-01-08
Supplement: 41422_2020_453_MOESM8_ESM.pdf [file 41422_2020_453_MOESM8_ESM.pdf]

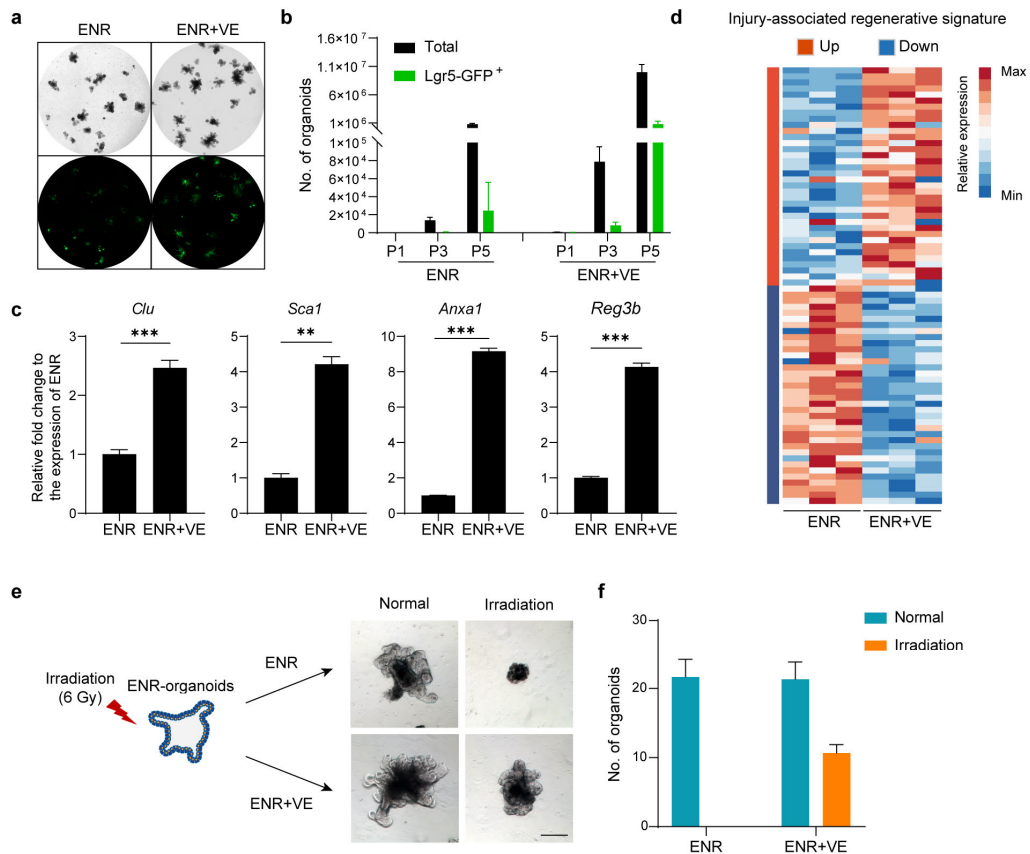

**Supplementary information Fig. S8 VPA and EPZ6438 promote the regenerative response in ENR-organoids**

**a**, Representative images of ENR-organoids with and without VPA/EPZ6438.

**b**, Quantification of total/Lgr5-GFP-expressing organoid number at different passages (n = 4 wells).

**c**, qPCR analyses of *Clu* and regenerative genes expression in organoids cultured under the indicated conditions (n = 2 wells). *P* values were determined by two-sided unpaired t-test.

**d**, Heatmap displaying the expression of an injury-induced regenerative signature in different organoids (n = 3 mice).

**e, f**, Representative images (e) and quantification of organoid number (f) cultured under

the indicated conditions with or without 6 Gy  $\gamma$ -irradiation. Scale bars, 100  $\mu\text{m}$ . (n = 4 wells).

\*\*\* $P < 0.001$ ; \*\* $P < 0.01$ ; All experiments were independently replicated at least three times with similar results.
