# Supplementary material for: Establishment of intestinal organoid cultures modeling injury-associated epithelial regeneration
Source: PubMed Central journal article supplement (PMC8027647; doi:10.1038/s41422-020-00453-x), 2021-01-08
Supplement: 41422_2020_453_MOESM11_ESM.pdf [file 41422_2020_453_MOESM11_ESM.pdf]

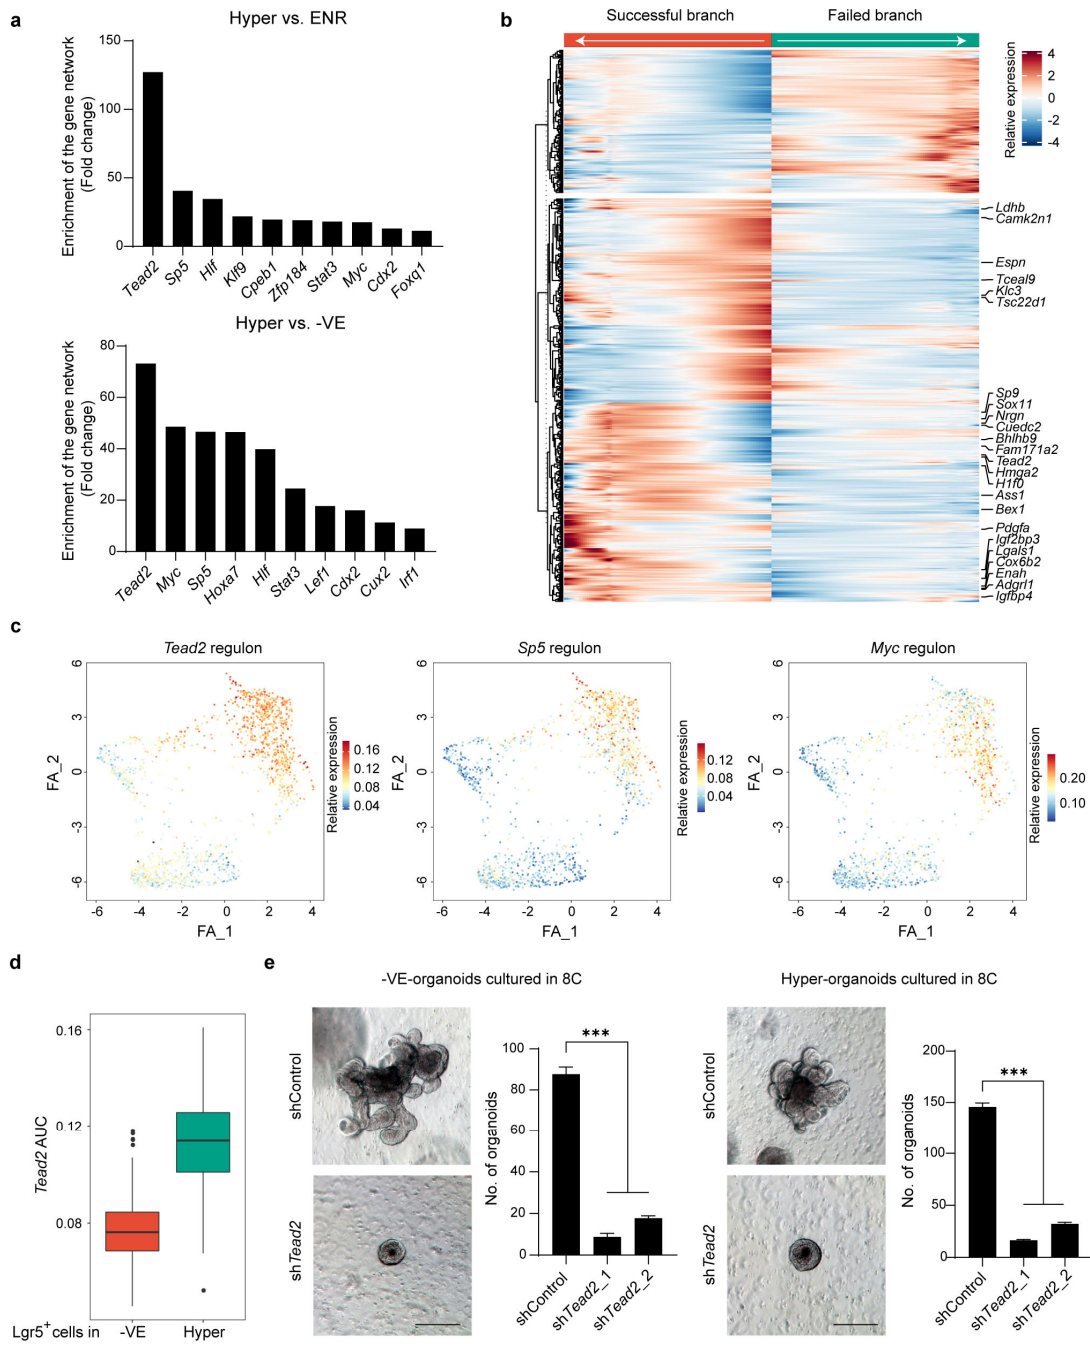

- b,** Gene expression heatmap of 500 differentially expressed genes between two branches in a pseudo-temporal order. Successful and failed regenerative trajectories (including pre-branch) are shown on the left and right, respectively. Representative genes of *Tead2* regulon are shown on the right.
- c,** ForceAtlas embedding plot displaying *Tead2*, *Sp5* and *Myc* regulons (red dots, active; blue dots, inactive) as well as their intensity distributions from Hyper-organoids with and without VPA/EPZ6438 shown in Fig. 3f.
- d,** Box plots displaying *Tead2* regulon activity measured by area under the curve (AUC) of *Lgr5*<sup>+</sup> cell in –VE and Hyper organoids.
- e,** Representative images and quantification of total organoid number cultured under the indicated conditions after the knockdowns with the indicated shRNA. –VE-organoids (left) or Hyper-organoids (right) were cultured in the 8C condition for 10 days. Scale bars, 100 μm.
