# Supplementary material for: Establishment of intestinal organoid cultures modeling injury-associated epithelial regeneration
Source: PubMed Central journal article supplement (PMC8027647; doi:10.1038/s41422-020-00453-x), 2021-01-08
Supplement: 41422_2020_453_MOESM13_ESM.pdf [file 41422_2020_453_MOESM13_ESM.pdf]

**Table S1. Gene set for the injury-associated regenerative signature****Upregulated genes**

|            |         |        |         |         |          |        |
|------------|---------|--------|---------|---------|----------|--------|
| AW112010   | Duoxa2  | Hs3st1 | Mecom   | Ripk3   | Stat2    | Ywhag  |
| Batf2      | Egln3   | Icam1  | Mst1r   | Rnf213  | Sulf2    | Zbp1   |
| C3         | Eif4e3  | Ido1   | Myo9b   | S100a11 | Tap1     | Zc3h7a |
| Capg       | Epha2   | Ier3   | Pitpnm1 | Sbno2   | Tgm2     |        |
| Cd74       | Gadd45g | Ifi47  | Pkp4    | Slc7a11 | Tmc6     |        |
| Cdk11b     | Gbp7    | Igtp   | Plec    | Socs1   | Tnfrsf1b |        |
| Cxcl2      | H2-Ab1  | Il4ra  | Plk2    | Socs3   | Trafd1   |        |
| D16Ert472e | H2-Q7   | Lpcat4 | Reg3b   | Spr1a   | Trim15   |        |
| Ddah1      | Hk2     | Lrg1   | Reg3g   | Srgn    | Trim40   |        |
| Duox2      | Hmox1   | Ly6a   | Rhof    | Stat1   | Ubd      |        |

**Downregulated genes**

|         |       |            |         |      |         |
|---------|-------|------------|---------|------|---------|
| Aadac   | Bphl  | Chpt1      | Gas6    | Lgr5 | Sult1d1 |
| Abat    | Car4  | Clps       | Gde1    | Maoa | Thra    |
| Adh1    | Cat   | Cmb1       | Gng11   | Maob | Ugt2b35 |
| Adtrp   | Ccl28 | Coq8a      | Gstm3   | Me2  | Vdr     |
| Akr1c14 | Ccl6  | Cth        | Gstm7   | Mme  |         |
| Aldh1a1 | Ces1e | Cyp2c68    | H2afv   | Naxe |         |
| Aoc1    | Ces1f | D630039A03 | Hadh    | Oat  |         |
| Aqp11   | Ces2a | Ddc        | Hsd11b2 | Otc  |         |
| Bche    | Ces2c | Fahd1      | Itln1   | Pccb |         |
| Bco2    | Ces2g | Fmo4       | Khk     | Scin |         |
