# Supplementary material for: Establishment of intestinal organoid cultures modeling injury-associated epithelial regeneration
Source: PubMed Central journal article supplement (PMC8027647; doi:10.1038/s41422-020-00453-x), 2021-01-08
Supplement: 41422_2020_453_MOESM14_ESM.pdf [file 41422_2020_453_MOESM14_ESM.pdf]

Table S2 Primers used in this study

RT-qPCR primers

| Gene         | Forward                | Reverse                |
|--------------|------------------------|------------------------|
| <i>Chu</i>   | ACAATCCTGCCCAGGCTAAC   | CAGGGATGAGGTGTTGAGCA   |
| <i>Scal</i>  | GATGGACACTTCTCACACTACA | GCAGGTAATTGATGGGCAAGA  |
| <i>Anxa1</i> | CTGACCAGCAGGAGCTTTC    | TGGCTTCGTACAGCTTCTCG   |
| <i>Reg3b</i> | CCTTAGACCGTGCTTTCTGTG  | GTCCATGATGCTCTTCAAGACA |
