# Supplementary material for: Establishment of intestinal organoid cultures modeling injury-associated epithelial regeneration
Source: PubMed Central journal article supplement (PMC8027647; doi:10.1038/s41422-020-00453-x), 2021-01-08
Supplement: 41422_2020_453_MOESM15_ESM.pdf [file 41422_2020_453_MOESM15_ESM.pdf]

Table S3 scRNA-Seq sample quality data

| Sample                               | Origin         | Passage number | Symbol | Cells Number<br>After QC | Average Genes<br>Number | Average UMI<br>Counts |
|--------------------------------------|----------------|----------------|--------|--------------------------|-------------------------|-----------------------|
| Hyper-organoids                      | ENR-organoids  | P1             | S23    | 2812                     | 3157                    | 49254                 |
| -VE-organoids                        |                | P1             | S22    | 2601                     | 3213                    | 52103                 |
| ENR-organoids                        |                | P2             | S21    | 2189                     | 3149                    | 46998                 |
| Hyper-organoids                      | ENR-organoids  | P6             | S63    | 3523                     | 3165                    | 40535                 |
| -VE-organoids                        |                | P6             | S62    | 4293                     | 3205                    | 41375                 |
| ENR-organoids                        |                | P7             | S61    | 2601                     | 3213                    | 48014                 |
| Hyper-organoids                      | Primary crypts | P3             | SC3    | 1983                     | 3170                    | 47158                 |
| ENR-organoids                        |                | P3             | SC1    | 2348                     | 3214                    | 39382                 |
| Colonic crypts from DSS treated mice |                |                | D2     | 1933                     | 3247                    | 16760                 |
| Colonic crypts from normal mice      |                |                | W4     | 1132                     | 3340                    | 17585                 |
