# Supplementary material for: Establishment of intestinal organoid cultures modeling injury-associated epithelial regeneration
Source: PubMed Central journal article supplement (PMC8027647; doi:10.1038/s41422-020-00453-x), 2021-01-08
Supplement: 41422_2020_453_MOESM16_ESM.pdf [file 41422_2020_453_MOESM16_ESM.pdf]

**Table S4 REAGENT or RESOURCE**

| <b>REAGENT or RESOURCE</b>                              | <b>SOURCE</b>                       | <b>IDENTIFIER</b> |
|---------------------------------------------------------|-------------------------------------|-------------------|
| <b>Antibodies</b>                                       |                                     |                   |
| Anti-Clusterin antibody                                 | Abcam                               | ab69644           |
| Mouse Sca-1/Ly6 Antibody                                | R&D                                 | MAB1226           |
| Annexin A1 Polyclonal Antibody                          | Invitrogen                          | PA5-27315         |
| Mouse Reg3B Antibody                                    | R&D                                 | MAB5110-SP        |
| Anti-MUC2 antibody                                      | Abcam                               | ab11197           |
| Anti-Lysozyme antibody                                  | Abcam                               | ab36362           |
| Chr-A Antibody (C-12)                                   | Santa Cruz Biotechnology            | sc-393941         |
| Human/Mouse EphB2 Antibody                              | R&D                                 | AF467             |
| PE Rat Anti-Mouse Ly-6A/E                               | BD                                  | 553108            |
| anti-H3K9me3                                            | Millipore                           | 07- 449           |
| anti-H3K9ac                                             | Abcam                               | ab4441            |
| anti-H3K27me3                                           | Abcam                               | ab6002            |
| anti-H3K27ac                                            | Abcam                               | ab4729            |
| anti-H3K4me3                                            | Abcam                               | ab8580            |
| anti-GAPDH                                              | Proteintech                         | 60004-1-Ig        |
| anti-Histone-H3                                         | Proteintech                         | 17168-1-AP        |
| Alexa Fluor ® 647 AffiniPure Donkey Anti-Goat IgG (H+L) | Jackson ImmunoResearch Laboratories | 705-605-147       |
| Cy™ 3 AffiniPure Donkey Anti-Rabbit IgG (H+L)           | Jackson ImmunoResearch Laboratories | 711-165-152       |
| Cy™ 3 AffiniPure Donkey Anti-Mouse IgG (H+L)            | Jackson ImmunoResearch Laboratories | 715-165-150       |
| <b>Chemicals, Peptides, and Recombinant Proteins</b>    |                                     |                   |
| LDN-193189                                              | Selleck                             | S2618             |
| GSK-3 Inhibitor XV                                      | CALBIOCHEM                          | 361558            |
| Pexmetinib (ARRY-614)                                   | Selleck                             | S7799             |
| Valproic acid sodium salt (VPA)                         | Sigma                               | P4543             |
| Tazemetostat (EPZ-6438)                                 | Selleck                             | S7128             |
| Verteporfin (VP)                                        | Selleck                             | S1786             |
| LPA                                                     | Cayman                              | 62215             |
| Recombinant Murine EGF                                  | PeproTech                           | 315-09            |
| Recombinant Murine Noggin                               | PeproTech                           | 250-38            |
| Recombinant Human R-Spondin-1                           | PeproTech                           | 120-38            |
| FGF2 (NM_002006) Human Recombinant Protein              | Origene                             | TP750002          |
